# Supplementary material for: Apelin signaling dependent endocardial protrusions promote cardiac trabeculation in zebrafish
Source: eLife journal article supplement (doi:10.7554/elife.73231), 2022-02-28
Supplement: supp [file elife_poa_e73231_Figure_2_source_data_1.xlsx]

## Sheet: Tabelle1
# of endocardial protrusions at 48 hpf
WT	irsp53dn
7	5
12	4
12	1
14	2
8	0
16	2
7	1
Unpaired t test
P value	<0,0001
P value summary	****
Significantly different (P < 0.05)?	Yes
One- or two-tailed P value?	Two-tailed
distribution of endocardial protrusions (average number of endocardial protrusions in different regions )
Region	WT	irsp53dn
i	1	0.666667
ii	4.42857	1.33333
iii	3.42857	1.66667
iv	0.571429	0
% of trabecular CMs at 72 hpf
WT	irsp53dn
30.5556	10.7143
34.0425	9.09091
40.4255	5.55556
32.5	13.6364
39.2857	15
35.5556	14.2857
34.2105	14.2857
34.7826
35.7143
Unpaired t test
P value	<0,0001
P value summary	****
Significantly different (P < 0.05)?	Yes
One- or two-tailed P value?	Two-tailed
# of Gmnn+ CMs at 72 hpf
WT	irsp53dn
8	3
16	1
13	4
10	4
31	2
11	3
23	5
19	2
	3
Unpaired t test
P value	0.0001
P value summary	***
Significantly different (P < 0.05)?	Yes
One- or two-tailed P value?	Two-tailed
