# Supplementary material for: Apelin signaling dependent endocardial protrusions promote cardiac trabeculation in zebrafish
Source: eLife journal article supplement (doi:10.7554/elife.73231), 2022-02-28
Supplement: supp [file elife_poa_e73231_Figure_4_source_data_1.xlsx]

## Sheet: Tabelle1
# of endocardial protrusions at 24 hpf
apln+/+	apln-/-
24	5
17	8
22	10
13	8
14	6
26	7
19	12
Unpaired t test
P value	0.0002
P value summary	***
Significantly different (P < 0.05)?	Yes
One- or two-tailed P value?	Two-tailed
# of endocardial protrusions at 48 hpf
apln+/+	apln-/-
15	1
9	3
9	2
12	7
14	5
8	2
Unpaired t test
P value	0.0004
P value summary	***
Significantly different (P < 0.05)?	Yes
One- or two-tailed P value?	Two-tailed
distribution of endocardial protrusions (average number of endocardial protrusions in different regions )
Region	apln+/+	apln-/-
i	1.3	0.5
ii	4	0.75
iii	4.12	1
iv	0.38	0.75
% of trabecular CMs at 72 hpf
apln+/+	apln-/-
30.5556	12.1212
37.0425	0
42.4255	6.66667
31.5	9.09091
42.2857	18.1818
30.5556	8.82353
34.2105	21.0526
35.7826
32.7143
Unpaired t test
P value	<0,0001
P value summary	****
Significantly different (P < 0.05)?	Yes
One- or two-tailed P value?	Two-tailed
CJ volume (µm3) at 72 hpf
apln+/+	apln-/-
591	5592
54	3401
502	8128
773	3079
150	3238
310	4320
79.3	2397
Unpaired t test
P value	0.0002
P value summary	***
Significantly different (P < 0.05)?	Yes
One- or two-tailed P value?	Two-tailed
