# Supplementary material for: Apelin signaling dependent endocardial protrusions promote cardiac trabeculation in zebrafish
Source: eLife journal article supplement (doi:10.7554/elife.73231), 2022-02-28
Supplement: supp [file elife_poa_e73231_Figure_5_source_data_1.xlsx]

## Sheet: Tabelle1
# of trabeculae					# of trabecular CMs					# of multilayered CMs
WT	fli1a:nrg2a	fli:nrg2a; irsp53dn	fli1a:nrg2a; apln-/-		WT	fli1a:nrg2a	fli:nrg2a; irsp53dn	fli1a:nrg2a; apln-/-		WT	fli1a:nrg2a	fli:nrg2a; irsp53dn	fli1a:nrg2a; apln-/-
4	8	0	2		10	15	1	5		0	18	3	4
4	5	2	3		11	15	3	6		0	11	5	5
4	6	3	6		12	11	3	9		0	9	7	5
3	8	2	1		7	10	1	2		0	8	7	6
5	9	1	4		15	13	3	3		0	5	5	3
4	6	1	0		11	18	7	4			13	9
1	5	2	3		8	11	1	2				11
5	4	7			13	19	4	4				5
4	4	1			8	13	2	1				5
5	4	7			11	13	4	1
6	3	4			7	17	5	0
4	10	1			13	16	2	5
4	7	4			9		3	5
4	8	6			12		0
5	6				11
3	6
4	9
5	8
4	5
5	5
3	6
3
Column B	fli1a:nrg2a				Column B	fli1a:nrg2a				Column B	fli1a:nrg2a
vs.	vs,				vs.	vs,				vs.	vs,
Column A	WT				Column A	WT				Column A	WT
Unpaired t test					Unpaired t test					Unpaired t test
P value	<0,0001				P value	0.0011				P value	0.0005
P value summary	****				P value summary	**				P value summary	***
Significantly different (P < 0.05)?	Yes				Significantly different (P < 0.05)?	Yes				Significantly different (P < 0.05)?	Yes
One- or two-tailed P value?	Two-tailed				One- or two-tailed P value?	Two-tailed				One- or two-tailed P value?	Two-tailed
Column C	fli:nrg2a; irsp53dn				Column C	fli:nrg2a; irsp53dn				Column C	fli:nrg2a; irsp53dn
vs.	vs,				vs.	vs,				vs.	vs,
Column B	fli1a:nrg2a				Column B	fli1a:nrg2a				Column B	fli1a:nrg2a
Unpaired t test					Unpaired t test					Unpaired t test
P value	<0,0001				P value	<0,0001				P value	0.0306
P value summary	****				P value summary	****				P value summary	*
Significantly different (P < 0.05)?	Yes				Significantly different (P < 0.05)?	Yes				Significantly different (P < 0.05)?	Yes
One- or two-tailed P value?	Two-tailed				One- or two-tailed P value?	Two-tailed				One- or two-tailed P value?	Two-tailed
Column D	fli:nrg2a; apln-/-				Column D	fli:nrg2a; apln-/-				Column D	fli:nrg2a; apln-/-
vs.	vs,				vs.	vs,				vs.	vs,
Column B	fli1a:nrg2a				Column B	fli1a:nrg2a				Column B	fli1a:nrg2a
Unpaired t test					Unpaired t test					Unpaired t test
P value	0.0003				P value	<0,0001				P value	0.0173
P value summary	***				P value summary	****				P value summary	*
Significantly different (P < 0.05)?	Yes				Significantly different (P < 0.05)?	Yes				Significantly different (P < 0.05)?	Yes
One- or two-tailed P value?	Two-tailed				One- or two-tailed P value?	Two-tailed				One- or two-tailed P value?	Two-tailed
