# Supplementary material for: Apelin signaling dependent endocardial protrusions promote cardiac trabeculation in zebrafish
Source: eLife journal article supplement (doi:10.7554/elife.73231), 2022-02-28
Supplement: supp [file elife_poa_e73231_Figure_6_source_data_1.xlsx]

## Sheet: Tabelle1
% of CMs with nuclear Clover at 72 hpf
WT	apln+/+	ErbB inhibitor	irsp53dn	apln-/-
8.98876	4.819	63.22	21.7391	34.83
13.4832	8.42	38.05	11.9565	16.55
6.81818	2.9126	33.33	10	25.24
6.25	4.10959	53.28	22.4138	20
0	3.3333	41.58	12.1212	43.7
13.7681	9.41177	52.71	13.0435	43.8
4.7619	7.95455	49.18	0	28.26
2.38095	9.41177	58.41	22.7273	21.5
10.6796	0	53.68	22.3684
4.70588			16.5138
2.46914			12.0482
3.19149
6.8
Column C	ErbB inhibitor
vs.	vs,
Column A	WT
Unpaired t test
P value	<0,0001
P value summary	****
Significantly different (P < 0.05)?	Yes
One- or two-tailed P value?	Two-tailed
Column D	irsp53dn
vs.	vs,
Column A	WT
Unpaired t test
P value	0.0014
P value summary	**
Significantly different (P < 0.05)?	Yes
One- or two-tailed P value?	Two-tailed
Column E	apln-/-
vs.	vs,
Column B	apln+/+
Unpaired t test
P value	<0,0001
P value summary	****
Significantly different (P < 0.05)?	Yes
One- or two-tailed P value?	Two-tailed
