# Supplementary material for: Apelin signaling dependent endocardial protrusions promote cardiac trabeculation in zebrafish
Source: eLife journal article supplement (doi:10.7554/elife.73231), 2022-02-28
Supplement: supp [file elife_poa_e73231_Supplementary_file_1.xlsx]

## Sheet: Figure 1-figure supplement 1
% of endocardial protrusions towards myocardium or lumen
	myocardium									lumen
48 hpf	77	93	89	89	83	89	91	88	85	23	7	11	11	17	11	9	12	15
60 hpf	94	78	92	82	82.4	88	82	91	83	6	22	8	18	17.6	12	18	9	17
72 hpf	90	82	67	86	91	79	91	85		10	18	33	14	9	21	9	15
# of endocardial protrusions in the ventricle or the atrium
	ventricle									atrium
48 hpf	13	15	9	9	10	9	13	12	15	1	5	8	4	4	2	5	3	5
60 hpf	17	9	11	13	11	9	12	9	11	3	4	4	2	4	3	3	4	2
72 hpf	10	11	12	10	15	13	12	11	10	1	3	3	3	5	3	0	2	1
% of endocardial protrusions in the outer curvature
48 hpf	60 hpf	72 hpf
64	100	100
91	63	100
73	75	100
100	80	100
88	70	75
86	100	50
100	100	75
67	100	100
78	100	60
56	50	73
	100
	50
	40
	100
	78
	50
% of endocardial protrusions close to de CMs or TL CMs
60 hpf	72 hpf
38	67
80	67
33	100
75	100
29	100
80	100
67	100
67	75
100	100
100	100
33
100
50
100
57
100
% of de CMs or TL CMs close to endocardial protrusions
60hpf	72hpf
100	100
100	100
100	83
100	100
67	50
100	100
100	100
100	100
100	100
100
100
100
100
100
100

## Sheet: Figure 4-figure supplement 2
% of EdU+ CMs at 72 hpf
apln+/+	apln-/-
20	20
13	8
23	13
20	6
13	14
12	1
6	5
23	6
20	14
Unpaired t test
P value	0.023
P value summary	*
Significantly different (P < 0.05)?	Yes
One- or two-tailed P value?	Two-tailed

## Sheet: Figure 4-figure supplement 3
heart rate (bpm) at 48 hpf
apln+/+	apln-/-
117	124
136	117
119	123
119	116
130	116
117	130
105	139
107	113
118	125
106	129
122	123
121	122
107	109
109	108
114	108
114	124
Unpaired t test
P value	0.1933
P value summary	ns
Significantly different (P < 0.05)?	No
One- or two-tailed P value?	Two-tailed
ejection fraction (%) at 72 hpf
apln+/+	apln-/-
45.11	33.95
32.82	28.14
42.88	42.36
36.7	39.92
32.05	35.24
30.81	42.27
Unpaired t test
P value	0.9416
P value summary	ns
Significantly different (P < 0.05)?	No
One- or two-tailed P value?	Two-tailed

## Sheet: Figure 4-figure supplement 4
# of endocardial touchdowns at 48 hpf
DMSO	Notch inhibitor
6	4
7	3
8	0
7	4
6	2
5	1
	4
	2
	2
	2
	1
	1
	2
	1
Unpaired t test
P value	<0,0001
P value summary	****
Significantly different (P < 0.05)?	Yes
One- or two-tailed P value?	Two-tailed
# of endocardial protrusions at 48 hpf
DMSO	Notch inhibitor
7	19
12	12
12	17
14	15
8	18
16
7
6
Unpaired t test
P value	0.0109
P value summary	*
Significantly different (P < 0.05)?	Yes
One- or two-tailed P value?	Two-tailed

## Sheet: Figure 5-figure supplement 1
	WT		apln-/-
nrg2a	633	526	557	734
Unpaired t test
P value	0.5887
P value summary	ns
Significantly different (P < 0.05)?	No
One- or two-tailed P value?	Two-tailed

## Sheet: Figure 6-figure supplement 1
% of CMs with nuclear Clover at 72 hpf
DMSO	MEK inhibitor
6.25	36.19
0	46.73
13.7681	39.58
4.7619	58.1
2.38095	43.01
10.6796	57.29
4.70588	50.4
2.46914	60
3.19149	32.98
	36.21
Unpaired t test
P value	<0,0001
P value summary	****
Significantly different (P < 0.05)?	Yes
One- or two-tailed P value?	Two-tailed
