# Supplementary figures and images for: Apelin signaling dependent endocardial protrusions promote cardiac trabeculation in zebrafish
Source: eLife journal article supplement (doi:10.7554/elife.73231), 2022-02-28

Figure 4-figure supplement 2

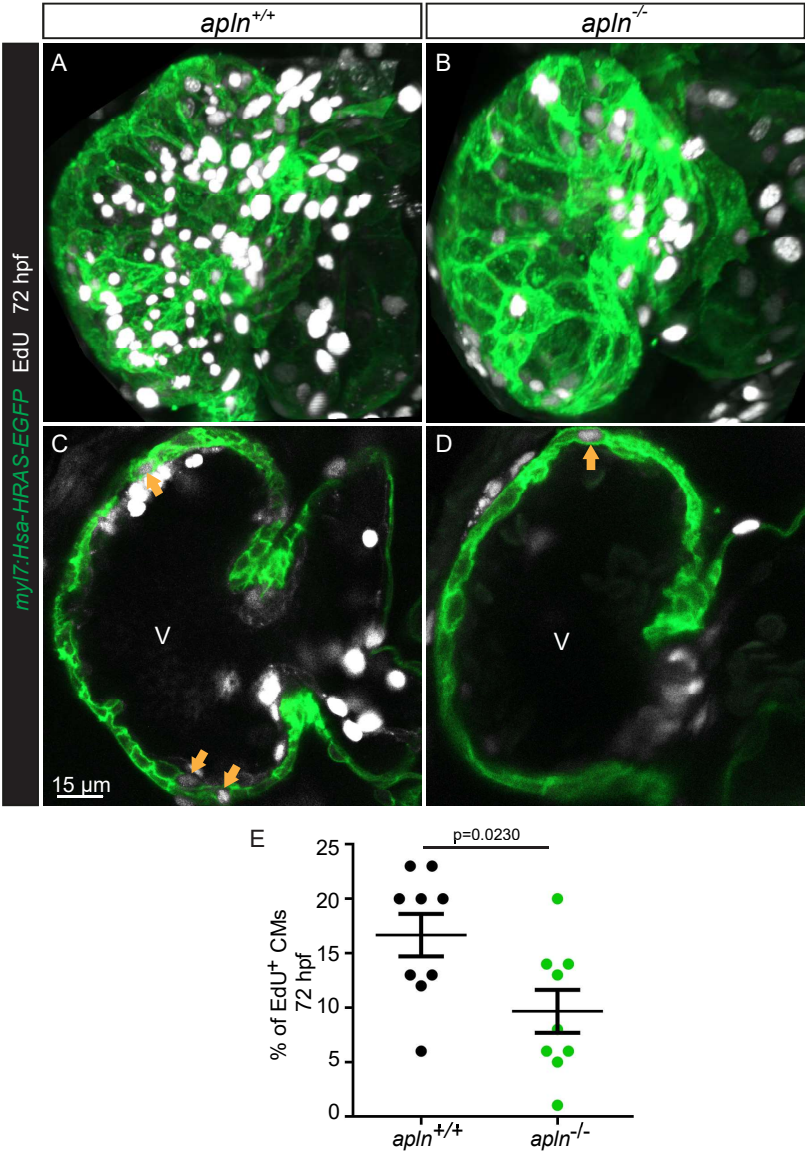

Supplement: supp [file elife-73231-supp-v1.zip]

Figure 6-figure supplement 2

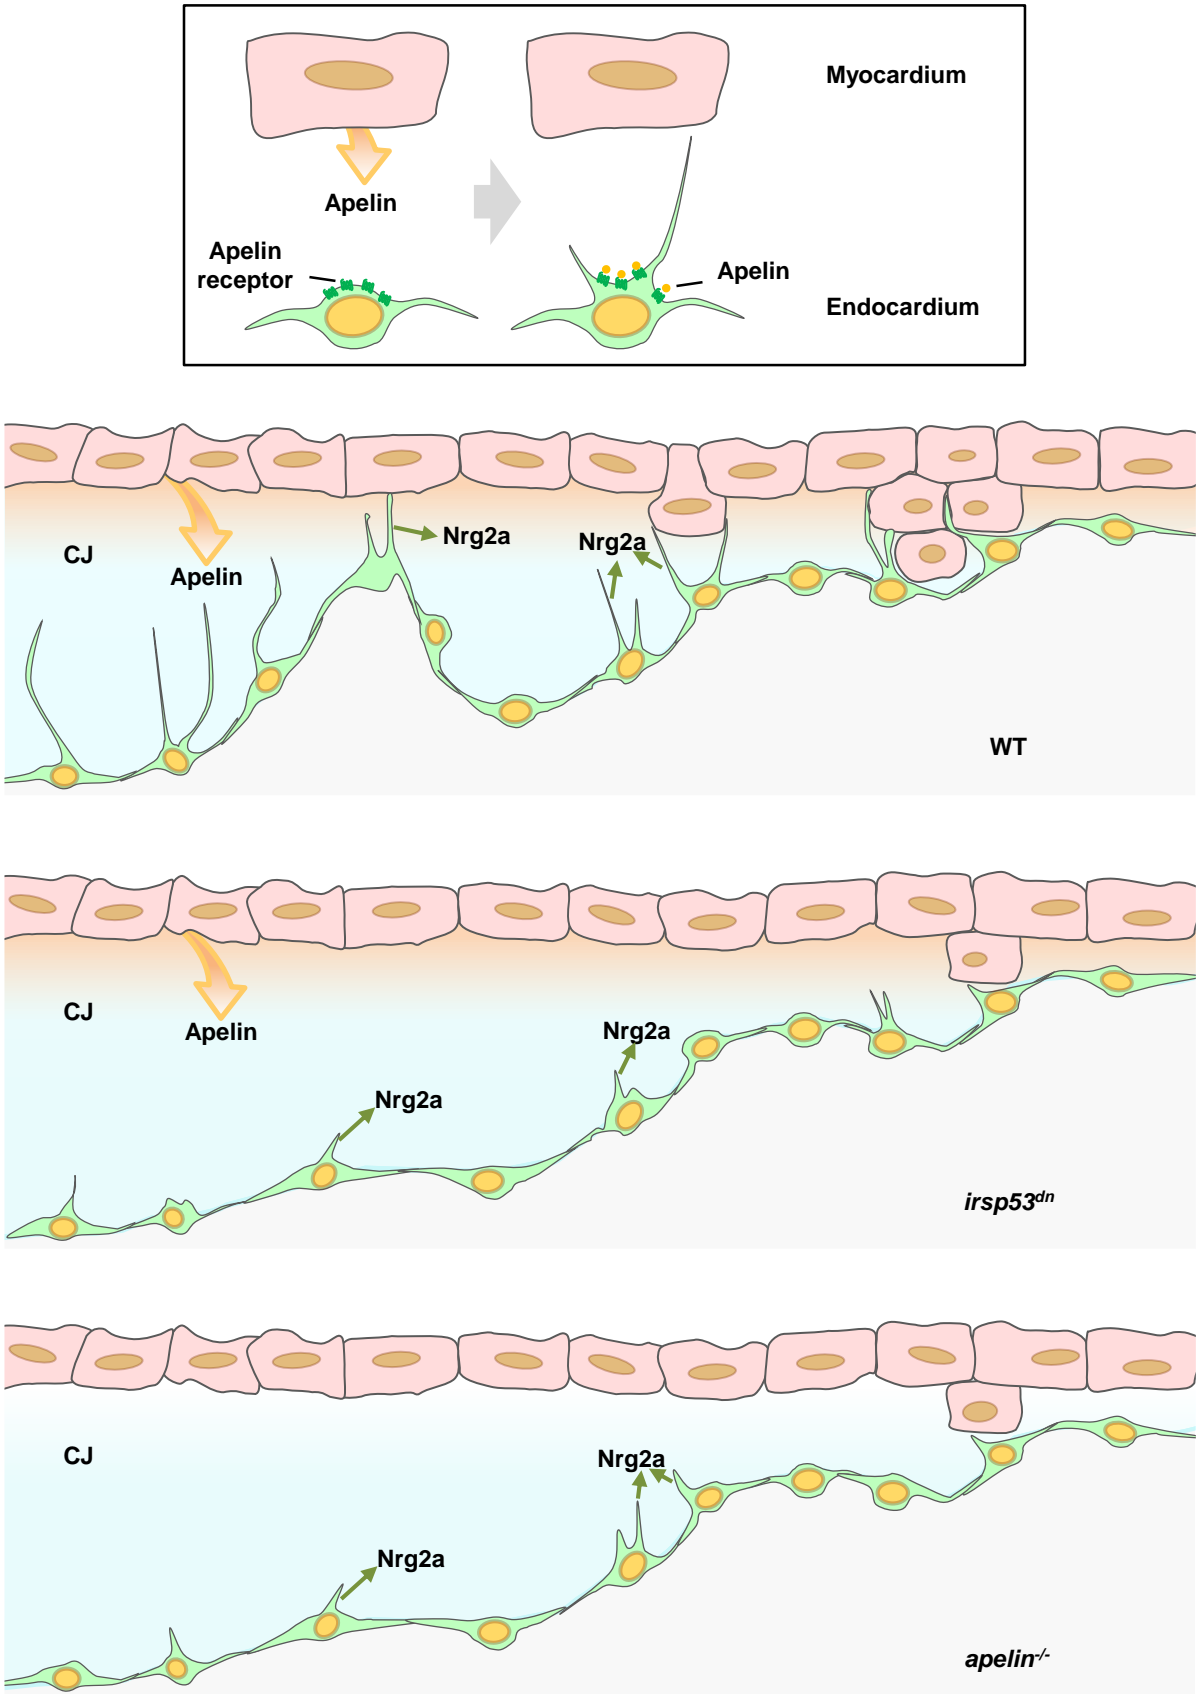

Supplement: supp [file elife-73231-supp-v1.zip]

Figure 5-figure supplement 1

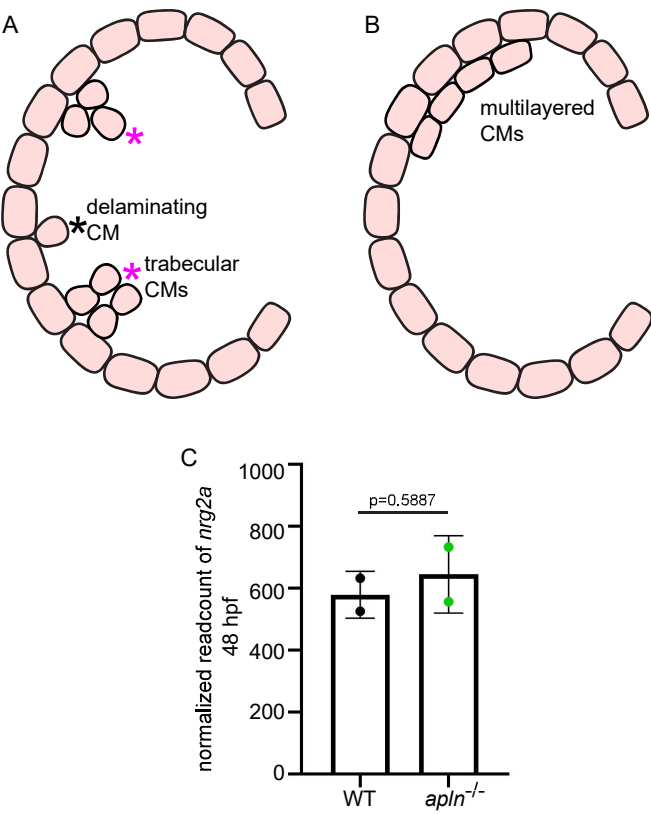

Supplement: supp [file elife-73231-supp-v1.zip]

Figure 4-figure supplement 1

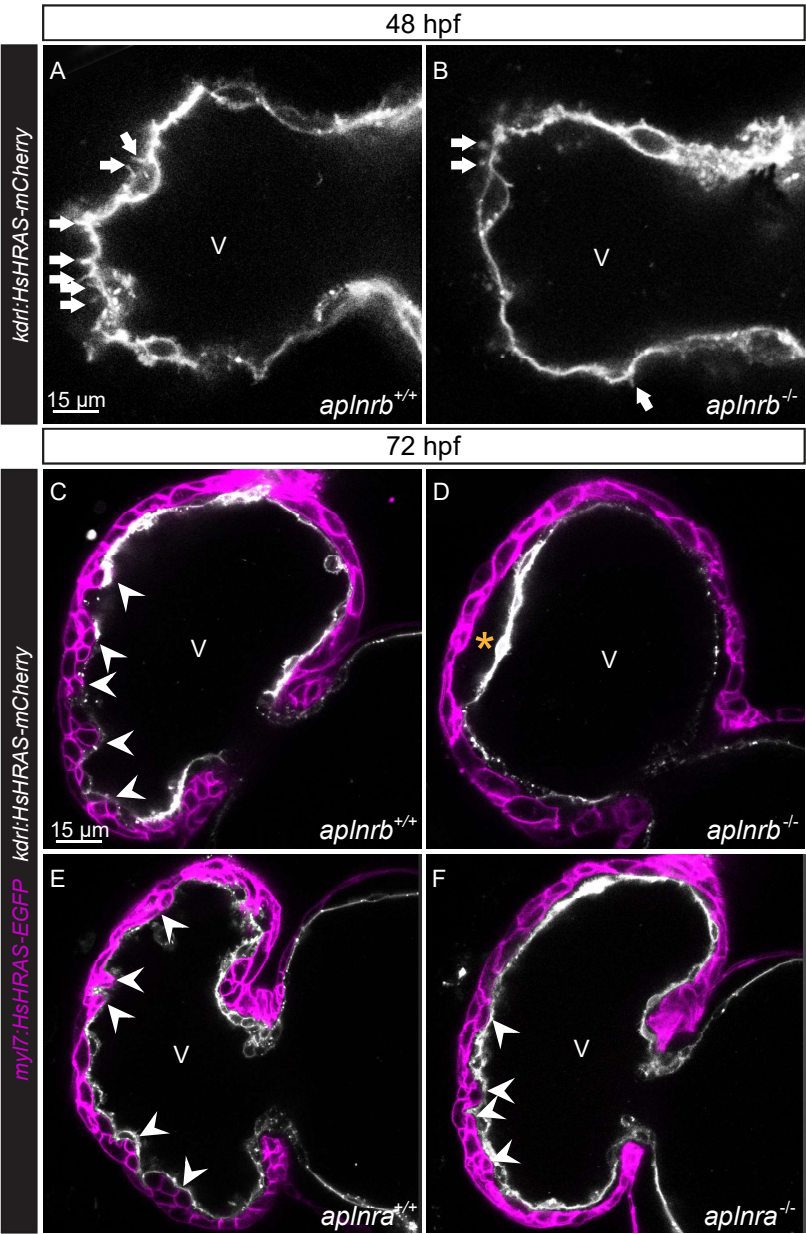

Supplement: supp [file elife-73231-supp-v1.zip]

Figure 6-figure supplement 1

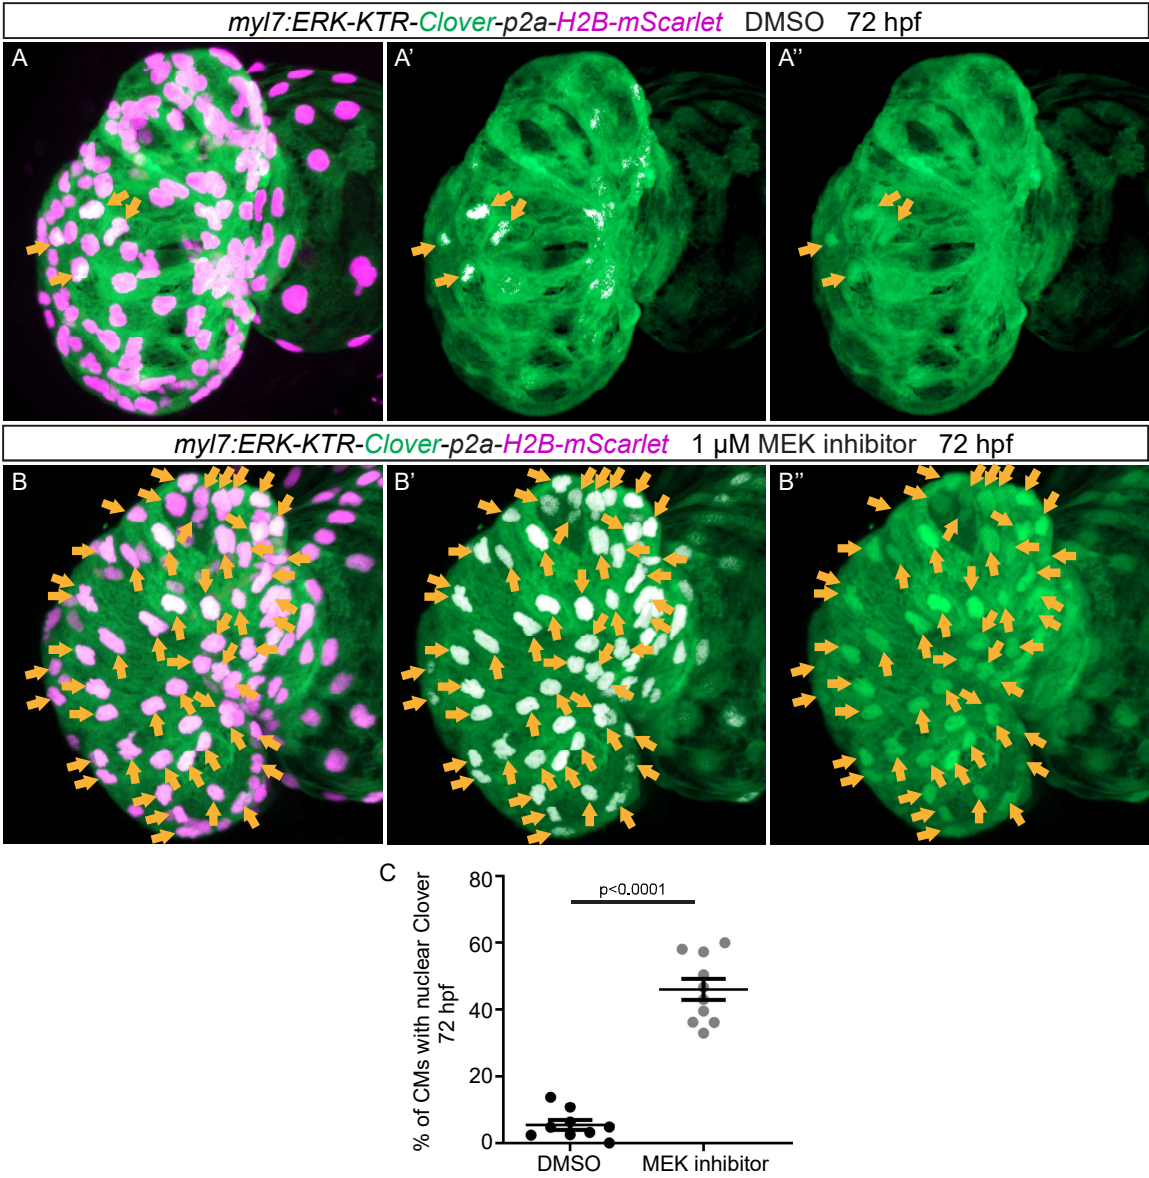

Supplement: supp [file elife-73231-supp-v1.zip]

Figure 4-figure supplement 3

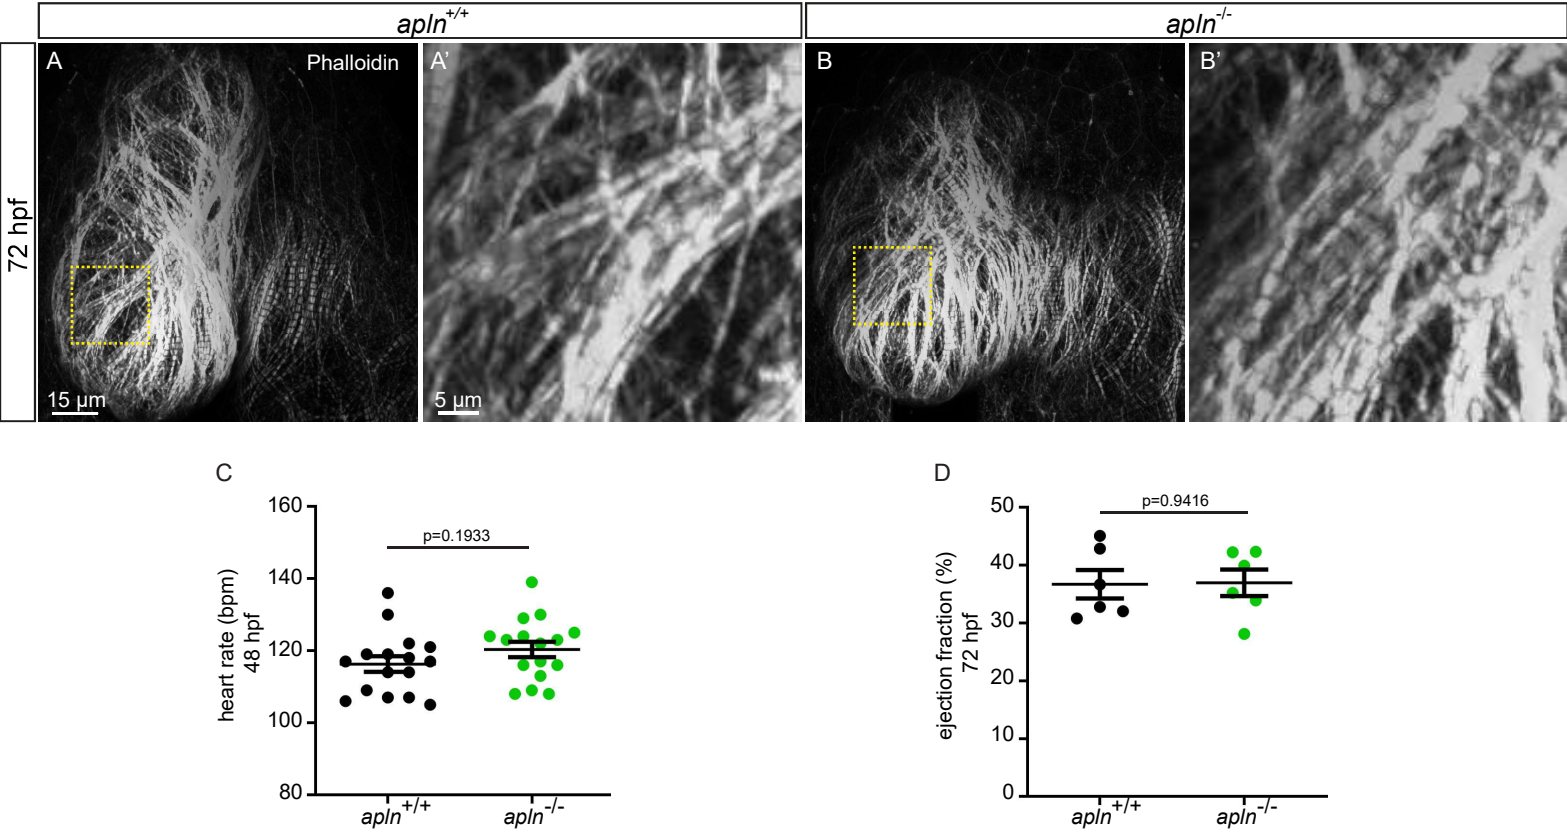

Supplement: supp [file elife-73231-supp-v1.zip]

Figure 4-figure supplement 4

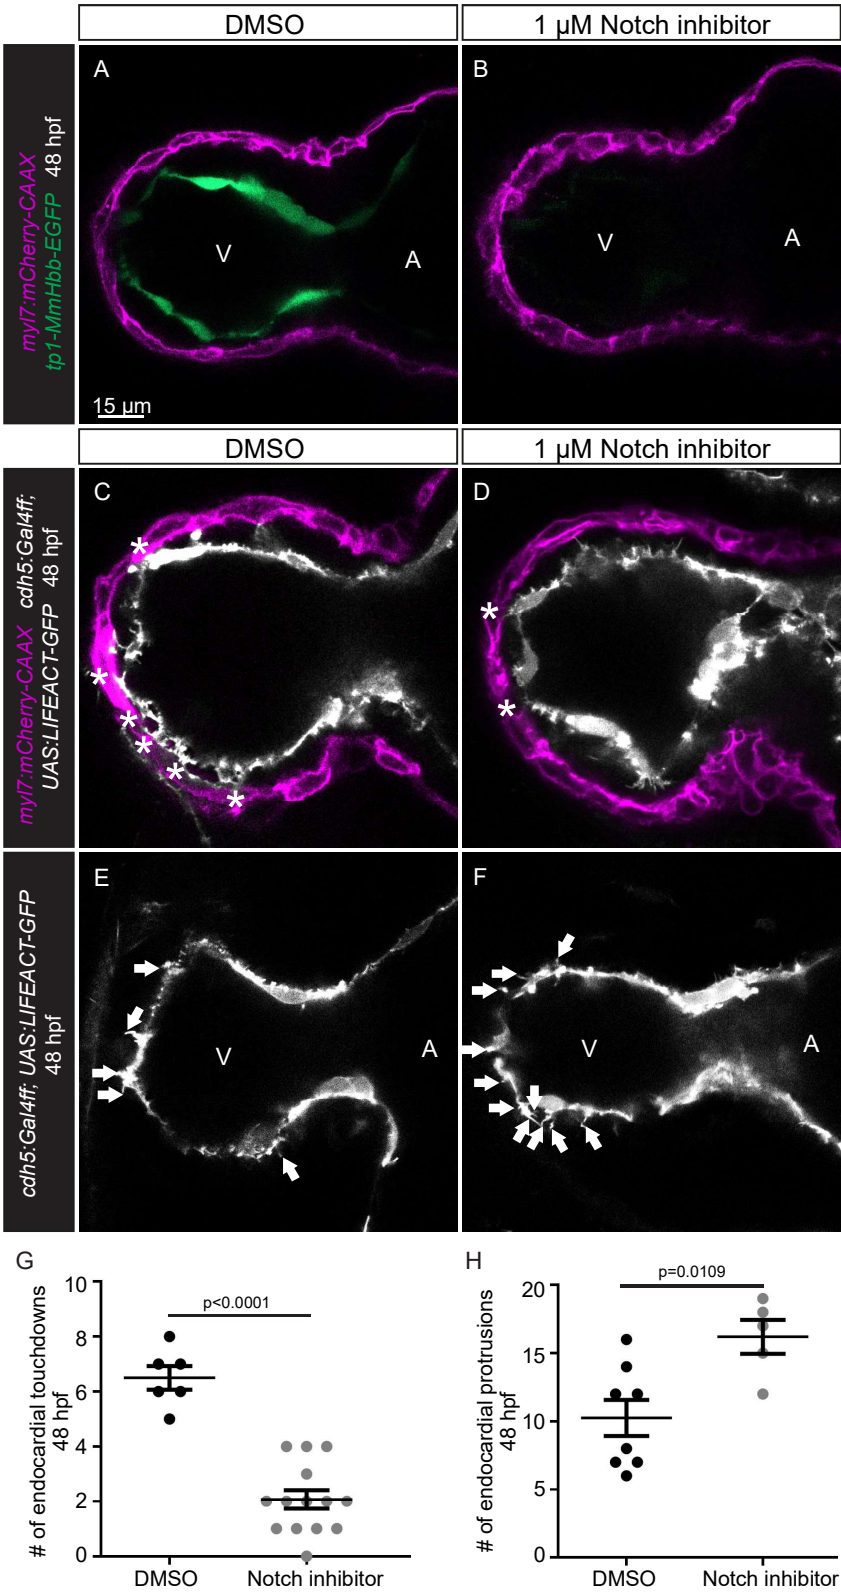

Supplement: supp [file elife-73231-supp-v1.zip]

Figure 1-figure supplement 1

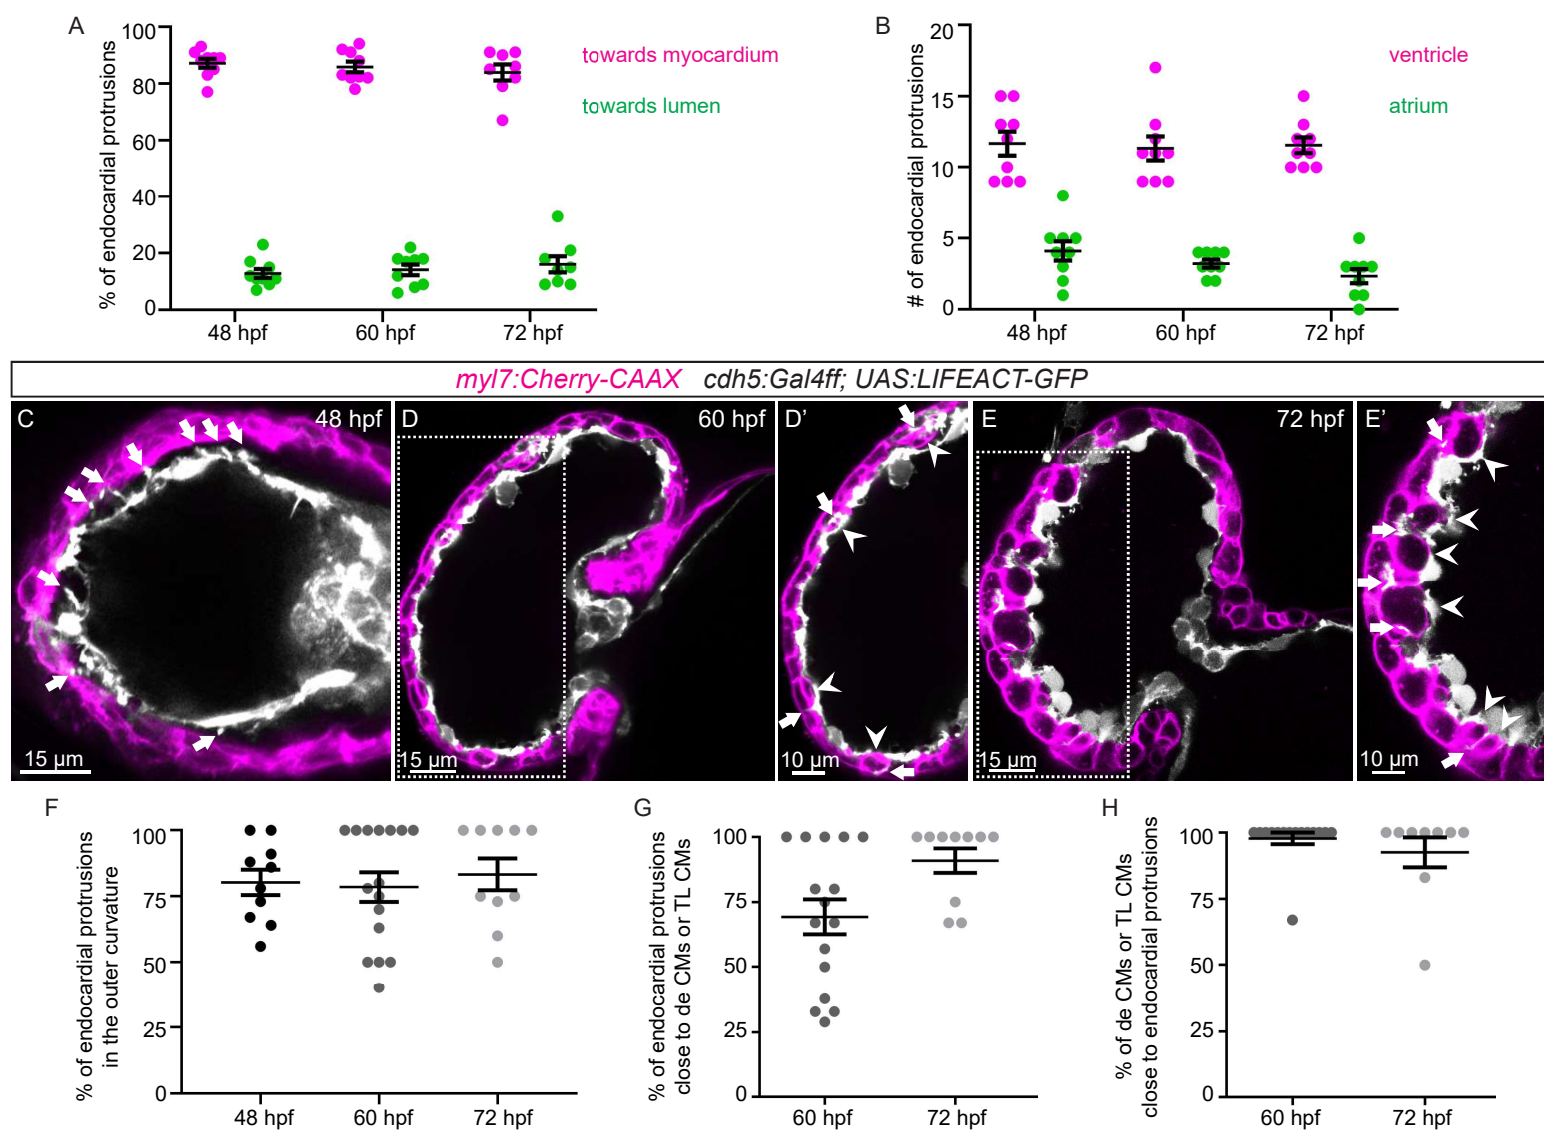

Supplement: supp [file elife-73231-supp-v1.zip]
